# Supplementary material for: Whole Genome Sequencing of Giant Schnauzer Dogs with Progressive Retinal Atrophy Establishes NECAP1 as a Novel Candidate Gene for Retinal Degeneration
Source: PubMed Central journal article supplement (PMC6562617; doi:10.3390/genes10050385), 2019-05-21
Supplement: genes-10-00385-s001.pdf [file genes-10-00385-s001.pdf]

**Supplementary Table 1.** Twenty-six known canine retinal mutations were excluded as causal variants in the GS cohort.

| Form of Retinal Degeneration                            | Locus or Abbreviation | Gene Involved     | Primer Sequences                                                                                                      | References                                      |
|---------------------------------------------------------|-----------------------|-------------------|-----------------------------------------------------------------------------------------------------------------------|-------------------------------------------------|
| Cone degeneration                                       | CD                    | <i>CNGB3</i>      | Pooled for multiplex PCR<br>F-CCCACCTACCATTATGTCTCTCTC;<br>R-TCAAACACCAGACAACACACA                                    | Sidjanin, Lowe [1], Yeh, Goldstein [2]          |
| Canine achromatopsia                                    | ACHM                  | <i>CNGA3</i>      | SNP_F-AGTGGGCGTCCTAATCTTTG;<br>SNP_R-CGGAATTGCATGTACTGCTT;<br>del_F-CCTGATCGACGAGGACGTG;<br>del_R-CGTTGTACTCGGCCAGGAG | Tanaka, Dutrow [3]                              |
| Congenital stationary night blindness/retinal dystrophy | CSNB                  | <i>RPE65</i>      | F-GACAATGCCCTTGTTAACGTC; R-AGCATTTTCGTCCTACCTGCTT                                                                     | Aguirre, Baldwin [4], Veske, Nilsson [5]        |
| Canine multifocal retinopathy                           | CMR1                  | <i>BEST1/VMD2</i> | F-CGTCACCTACTCAAGCCAAGT; R-TAGCTGAGCAGGAAGATGAGG                                                                      | Guziewicz, Zangerl [6]                          |
| Canine multifocal retinopathy                           | CMR2                  | <i>BEST1/VMD2</i> | F-GGCCCTCCCCATCCACTG; R-CAGGGCACCCAGAACGTGT                                                                           | Guziewicz, Zangerl [6]                          |
| Canine multifocal retinopathy                           | CMR3                  | <i>BEST1/VMD2</i> | F-AAGGCCTGGGAGATTAAGGAG; R-CTGACTGTCCAGATGGGAAGA                                                                      | Zangerl, Wickstrom [7]                          |
| Generalised PRA                                         | gPRA                  | <i>CCDC66</i>     | F-<br>GCTCATACTGCTTAGATGTCTCTTG;<br>R-CAATACTTCCAATCAGCCAAA                                                           | Lippmann, Jonkisz [8], Dekomien, Vollrath [9]   |
| Progressive retinal atrophy                             | PRA                   | <i>CNGB1</i>      | F-CCACCCAGGCTCAGCAG; R-TCAGGCAGCCCACCAAT                                                                              | Ahonen, Arumilli [10]                           |
| Photoreceptor dysplasia                                 | PD                    | <i>PDC</i>        | F-TGTCTATTTCCAGATGAGCATT; R-AAACTCAGCTTCTGGTGCATATC                                                                   | Zhang, Acland [11]                              |
| Progressive rod-cone degeneration                       | PRCD                  | <i>PRCD</i>       | F-TTTCTCCTGCAGACTCTGTCC; R-CAGCTTCTCACGGTTGGA                                                                         | Zangerl, Goldstein [12]                         |
| Autosomal dominant PRA                                  | ADPRA                 | <i>RHO</i>        | F-ACACCCGTCTTGTTGGAGAA; R-CCTCAGCAGCACTTTAGGAC                                                                        | Kijas, Cideciyan [13]                           |
| Progressive retinal atrophy                             | GR_PRA1               | <i>SLC4A3</i>     | F-CTGCCAGGTGAGTGCTAGA; R-CACTCCCGTTCAGCTCCAG                                                                          | Downs, Wallin-Hakansson [14]                    |
| Progressive retinal atrophy                             | GR_PRA2               | <i>TTC8</i>       | F-TGGACTTGGCTGCCCTTT; R-CCATGTCTAAGCCCTTCACAA                                                                         | Downs, Wallin-Hakansson [15]                    |
| Progressive retinal atrophy                             | PRA                   | <i>CNGA1</i>      | F-GCAATCGAAGAACAGCCAAT; R-GCTTTCCCTTCTCTTCTAGCAT                                                                      | Wiik, Ropstad [16]                              |
| Cone-rod dystrophy                                      | CORD1                 | <i>RPGRI1</i>     | Genotyped individually<br>6FAM-<br>GAAGAGCACATGTTGGTGAAGG; R-TGAGCTTTGTTGCCTTTGG                                      | Mellersh, Bournnell [17], Narfstrom, Jeong [18] |

|                                  |       |                |                                                                                                                                          |                                             |
|----------------------------------|-------|----------------|------------------------------------------------------------------------------------------------------------------------------------------|---------------------------------------------|
| Cone-rod dystrophy (early onset) | EORD  | <i>MAP9</i>    | 6FAM-GTCGATGGAGGTCTCCGTAT;<br>R- AACCTGGACCATGGGCAATA                                                                                    | Forman, Hitti [19]                          |
| Cone-rod dystrophy               | CRD3  | <i>ADAM9</i>   | Nor_F-<br>AAGTACCTACCCTCCCGTTCA;<br>Nor_R-<br>GTAGGATGGAGGTCGAAGAGG; Aff-<br>F- TTGGAACACCTAAATGCCTTG;<br>Aff-R-<br>GTAACCCAGCCAACACAGTA | Kropatsch, Petrasch-Parwez [20]             |
| Cone-rod dystrophy               | CRD   | <i>NPHP4</i>   | F-<br>AGTTCCTTCAGTTACGTCAACCAT;<br>R-<br>CTTCCAACACACAGACAGTACTCC                                                                        | Wiik, Wade [21]                             |
| Rod-cone dystrophy               | RCD1  | <i>PDE6B</i>   | F-GAAGAGATCCTGCCCATGTT; R-<br>TGTCCTCTTGTTGCTGCTTCT                                                                                      | Clements, Gregory [22], Suber, Pittler [23] |
| Rod-cone dystrophy               | RCD1a | <i>PDE6B</i>   | F-GAAGAGATCCTGCCCATGTT; R-<br>TGTCCTCTTGTTGCTGCTTCT                                                                                      | Dekomien, Runte [24]                        |
| Rod-cone dystrophy               | RCD3  | <i>PDE6A</i>   | F-CAGGACTGGGTGAGGATGATA; R-<br>ACTTGAAATACAGGGCGAGGT                                                                                     | Petersen-Jones, Entz [25]                   |
| Rod-cone degeneration            | RCD4  | <i>C2ORF71</i> | 6FAM-CCGAGTGCTCCCTCTGTG; R-<br>GGCTGCAGGCCTCGTC                                                                                          | Downs, Bell [26]                            |
| Progressive retinal atrophy      | PRA3  | <i>FAM161A</i> | Aff_F-<br>GGATCCCTTTATTTGATTTTAGAAA<br>G; Nor_F-<br>TCCCTTCCTTTTATTTGATTTTAGAA<br>AG; R-6FAM-<br>CAACAAACACAACCTGAGCAA                   | Downs and Mellersh [27]                     |
| Early retinal degeneration       | ERD   | <i>STK38L</i>  | F- CAGCCGCACCTAAAATGTAAA;<br>R- CTTTATTCTTGGGTGAACTCCA                                                                                   | Acland, Ray [28], Goldstein, Kukekova [29]  |

**Supplementary Table 2.** Multiplex PCR amplification using pooled primers.

| Component                               | Volume/Reaction (µL) | Final Concentration |
|-----------------------------------------|----------------------|---------------------|
| Primer mix                              | 5                    | 0.2 mM              |
| dNTPs (1.5mM)                           | 2.27                 | 0.2 mM              |
| HotStarTaq Plus 10x PCR buffer          | 1.70                 | 1x                  |
| MgCl <sub>2</sub> (25x)                 | 1.02                 | 1.5 mM              |
| HotStarTaq Plus Polymerase (5 units/µL) | 0.30                 | 0.09 units/µL       |
| Water                                   | 4.71                 |                     |
| Total (µL)                              | 15                   |                     |

**Supplementary Table 3.** Thermal cycling conditions for multiplex PCR amplification using pooled primers.

| Temperature (°C) | Time   |             |
|------------------|--------|-------------|
| 95               | 10 min |             |
| 95               | 15 s   | } 25 cycles |
| 60               | 2 min  |             |
| 60               | 30 min |             |
| 12               | Hold   |             |

**Supplementary Table 4.** Primer and probe sequences for allelic discrimination assay to determine *NECAP1* genotypes.

| Primer         | Sequence                        |
|----------------|---------------------------------|
| qPCR1 primer 1 | CAACCAAGAAGGGAGGTGTT            |
| qPCR1 primer 2 | GAGGATGGTGGGGGAATAGT            |
| qPCR1 probe 1  | HEX-CACAGGGGCTGGGGGTTTAA-IBFQ   |
| qPCR1 probe 2  | FAM-AGACCACAGGGGCTAGGGGTTT-IBFQ |

**Supplementary Table 5.** PCR amplification for the Finnish cohort.

| Component                             | Volume/reaction (μL) | Final Concentration |
|---------------------------------------|----------------------|---------------------|
| 10× PCR Buffer                        | 1.2                  | 1×                  |
| MgCl <sub>2</sub> (50mM)              | 0.4                  | 0.008 mM            |
| dNTP (10mM)                           | 0.24                 | 0.024 mM            |
| Forward primer (5 mM)                 | 1.9                  | 0.38 mM             |
| Reverse primer (5 mM)                 | 1.9                  | 0.38 mM             |
| Betaine (5M)                          | 2                    | 0.4 mM              |
| Biotools DNA Polymerase (5 units/ μL) | 0.1                  | 0.02                |
| Water                                 | 3.06                 |                     |
| Total (μL)                            | 10.8                 | 0.12                |

**Supplementary Table 6.** Primer sequences to amplify SNVs downstream and upstream *NECAP1* variant to determine a disease associated haplotype.

| Primer     | Sequence                |
|------------|-------------------------|
| 36894608_F | CAGGTGCCCTCAAAGAATCTA   |
| 36894608_R | CAGAGCCTTGCTCTAACTCCA   |
| 37020314_F | CTTGAATGCTCCATCTCAAC    |
| 37020314_R | CTGCATACTGGTTGGTCGATT   |
| 37425357_F | TTCTTGATCTCCAGGGAGAGAG  |
| 37425357_R | TCTTCCCTCTGGAAGAGGTTT   |
| 37467780_F | TGGAACCTCCATTCACTGTT    |
| 37467780_R | GGTGCTATGCGTTACCACTGT   |
| 37501948_F | CCTTCTAGACTCTTGTAACCCTG |
| 37501948_R | GGGAATACTGGACAGTTACATGC |
| 37541149_F | AACGTAGGCCAGTGACCTAT    |
| 37541149_R | CCACAAGTGTGGGAGATTTA    |
| 37644083_F | AAGATCCAGTCTCTGGCTGGT   |
| 37644083_R | CTCTCATTGCCACACAGTCAA   |
| 37770618_F | GCCTATAAAGACAGTTCTCCAAT |
| 37770618_R | GCACCTGCATTGGTATCATT    |

**Supplementary Table 7.** Known breed compositions of 13/15 *NECAP1* heterozygous mixed breed dogs as tested by Wisdom Health, UK.

| Dog | Breed composition                                                                       |
|-----|-----------------------------------------------------------------------------------------|
| 1   | 50% Dachshund mix                                                                       |
| 2   | 50% Pekingese mix, (trace German Spitz)                                                 |
| 3   | 25 % Poodle, 12.5% Russell terrier, 12.5 % Vizsla mix (trace German Spitz)              |
| 4   | 25% Australian Kelpie, 25% Labrador, mix (trace Dachshund)                              |
| 5   | 62.5% Dachshund, 12.5% Brittany Spaniel mix                                             |
| 6   | 37.5% American Staffordshire Terrier, 12.5% Labrador, 25% Dutch Shepherd dog mix        |
| 7   | 50% German Shepherd dog mix (Trace dachshund)                                           |
| 8   | 50% Labrador mix                                                                        |
| 9   | 75% Pomeranian mix                                                                      |
| 10  | 12.5% Rottweiler, 12.5 % Tibetan Mastiff, mix                                           |
| 11  | 25% Poodle, 25% Kritikos Lagonikos, mix (trace Japanese Spitz)                          |
| 12  | 12.5% Dachshund, 12.5% Pumi, 12.5 % Pekingese mix                                       |
| 13  | 12.5 % Dachshund, 12.5% Rhodesian Ridgeback, 12.5% Kritikos Lagonikos, 12.5% Poodle mix |

| CanFam3.0 Position | Location from <i>NECAP1</i> variant | REF allele | Giant Schnauzer |          |               |          |                 |          |                 |          |                  |          | Giant Spitz    |          | MLHD       |          |           |          |           |          |           |          |           |          |           |          |           |          |
|--------------------|-------------------------------------|------------|-----------------|----------|---------------|----------|-----------------|----------|-----------------|----------|------------------|----------|----------------|----------|------------|----------|-----------|----------|-----------|----------|-----------|----------|-----------|----------|-----------|----------|-----------|----------|
|                    |                                     |            | GS_29455_case   |          | GS_32059_case |          | GS_29746_parent |          | GS_29747_parent |          | GS_32603_control |          | Giant_Spitz104 |          | MLHD_27322 |          | MLHD_7094 |          | MLHD_6445 |          | MLHD_5741 |          | MLHD_6441 |          | MLHD_5128 |          | MLHD_1617 |          |
|                    |                                     |            | Allele 1        | Allele 2 | Allele 1      | Allele 2 | Allele 1        | Allele 2 | Allele 1        | Allele 2 | Allele 1         | Allele 2 | Allele 1       | Allele 2 | Allele 1   | Allele 2 | Allele 1  | Allele 2 | Allele 1  | Allele 2 | Allele 1  | Allele 2 | Allele 1  | Allele 2 | Allele 1  | Allele 2 | Allele 1  | Allele 2 |
| 27:36894608        | 573 Kb downstream                   | G          | A               | A        | A             | A        | G               | A        | G               | A        | G                | G        | G              | G        | G          | G        | A         | A        | G         | A        | G         | G        | A         | A        | G         | G        | G         | G        |
| 27:37020314        | 447 Kb downstream                   | G          | A               | A        | A             | A        | G               | A        | G               | A        | G                | G        | G              | A        | G          | G        | G         | G        | G         | A        | G         | G        | G         | G        | G         | G        | G         | G        |
| 27:37425357        | 43 Kb downstream                    | T          | C               | C        | C             | C        | T               | C        | T               | C        | T                | T        | T              | C        | T          | C        | T         | C        | T         | C        | T         | C        | T         | C        | T         | C        | T         | T        |
| 27:37467780        | 4 Kb downstream                     | G          | A               | A        | A             | A        | G               | A        | G               | A        | G                | G        | G              | A        | G          | A        | G         | A        | G         | A        | G         | A        | G         | A        | G         | A        | G         | G        |
| 27:37468611        | <b>NECAP1 VARIANT</b>               | <b>G</b>   | <b>A</b>        | <b>A</b> | <b>A</b>      | <b>A</b> | <b>G</b>        | <b>A</b> | <b>G</b>        | <b>A</b> | <b>G</b>         | <b>G</b> | <b>G</b>       | <b>A</b> | <b>G</b>   | <b>A</b> | <b>G</b>  | <b>A</b> | <b>G</b>  | <b>A</b> | <b>G</b>  | <b>A</b> | <b>G</b>  | <b>A</b> | <b>G</b>  | <b>A</b> | <b>G</b>  |          |
| 27:37501948        | 33 Kb upstream                      | T          | C               | C        | C             | C        | T               | C        | T               | C        | T                | T        | T              | C        | T          | C        | T         | C        | T         | C        | T         | C        | T         | C        | T         | C        | T         | T        |
| 27:37541149        | 72 Kb upstream                      | G          | A               | A        | A             | A        | G               | A        | G               | A        | G                | G        | G              | A        | G          | A        | G         | A        | G         | A        | G         | A        | G         | A        | G         | A        | G         | G        |
| 27:37644083        | 175 Kb upstream                     | A          | G               | G        | G             | G        | A               | G        | A               | G        | A                | G        | A              | G        | A          | A        | A         | A        | -         | -        | A         | A        | A         | A        | A         | A        | A         | A        |
| 27:37770618        | 301 Kb upstream                     | A          | G               | G        | G             | G        | A               | G        | A               | G        | A                | G        | A              | G        | G          | G        | G         | G        | A         | G        | A         | G        | A         | G        | A         | G        | A         | A        |

**Figure S1.** To build a disease-associated haplotype, a total of eight SNVs up to 301 kb upstream and 573 kb downstream of the *NECAP1* variant were genotyped in two PRA affected GS *NECAP1* homozygotes, both *NECAP1*<sup>+/-</sup> unaffected parents, and an unaffected *NECAP1*<sup>+/+</sup> GS; one *NECAP1*<sup>+/-</sup> Giant Spitz from the DBVDC; six *NECAP1*<sup>+/-</sup> Miniature Longhaired Dachshunds and one *NECAP1*<sup>+/+</sup> Miniature Longhaired Dachshund. A disease associated haplotype (shaded orange) was determined. The alternate allele is shaded yellow.

## References

1. Sidjanin, D.J.; Lowe, J.K.; McElwee, J.L.; Milne, B.S.; Phippen, T.M.; Sargan, D.R.; Aguirre, G.D.; Acland, G.M.; Ostrander, E.A. Canine CNGB3 mutations establish cone degeneration as orthologous to the human achromatopsia locus ACHM3. *Hum. Mol. Genetic.* **2002**, *11*, 1823–1833.
2. Yeh, C.Y.; Goldstein, O.; Kukekova, A.V.; Holley, D.; Knollinger, A.M.; Huson, H.J.; Pearce-Kelling, S.E.; Acland, G.M.; Komaromy, A.M. Genomic deletion of CNGB3 is identical by descent in multiple canine breeds and causes achromatopsia. *BMC Genet.* **2013**, *14*, 27.
3. Tanaka, N.; Dutrow, E.V.; Miyadera, K.; Delemotte, L.; MacDermaid, C.M.; Reinstein, S.L.; Crumley, W.R.; Dixon, C.J.; Casal, M.L.; Klein, M.L.; et al. Canine CNGA3 Gene Mutations Provide Novel Insights into Human Achromatopsia-Associated Channelopathies and Treatment. *PLoS ONE* **2015**, *10*, e0138943.
4. Aguirre, G.D.; Baldwin, V.; Pearce-Kelling, S.; Narfstrom, K.; Ray, K.; Acland, G.M. Congenital stationary night blindness in the dog: common mutation in the RPE65 gene indicates founder effect. *Mol. Vis.* **1998**, *4*, 23.
5. Veske, A.; Nilsson, S.E.; Narfstrom, K.; Gal, A. Retinal dystrophy of Swedish briard/briard-beagle dogs is due to a 4-bp deletion in RPE65. *Genomics* **1999**, *57*, 57–61.
6. Guziewicz, K.E.; Zangerl, B.; Lindauer, S.J.; Mullins, R.F.; Sandmeyer, L.S.; Grahn, B.H.; Stone, E.M.; Acland, G.M.; Aguirre, G.D. Bestrophin gene mutations cause canine multifocal retinopathy: a novel animal model for best disease. *Invest. Ophthalmol. Vis. Sci.* **2007**, *48*, 1959–1967.
7. Zangerl, B.; Wickstrom, K.; Slavik, J.; Lindauer, S.J.; Ahonen, S.; Schelling, C.; Lohi, H.; Guziewicz, K.E.; Aguirre, G.D. Assessment of canine BEST1 variations identifies new mutations and establishes an independent bestrophinopathy model (cmr3). *Mol. Vis.* **2010**, *16*, 2791–2804.
8. Lippmann, T.; Jonkisz, A.; Dobosz, T.; Petrasch-Parwez, E.; Epplen, J.T.; Dekomien, G. Haplotype-defined linkage region for gPRA in Schapendoes dogs. *Mol. Vis.* **2007**, *13*, 174–180.
9. Dekomien, G.; Vollrath, C.; Petrasch-Parwez, E.; Boeve, M.H.; Akkad, D.A.; Gerding, W.M.; Epplen, J.T. Progressive retinal atrophy in Schapendoes dogs: mutation of the newly identified CCDC66 gene. *Neurogenetics* **2010**, *11*, 163–174.
10. Ahonen, S.J.; Arumilli, M.; Lohi, H. A CNGB1 frameshift mutation in Papillon and Phalene dogs with progressive retinal atrophy. *PLoS ONE* **2013**, *8*, e72122.
11. Zhang, Q.; Acland, G.M.; Parshall, C.J.; Haskell, J.; Ray, K.; Aguirre, G.D. Characterization of canine photoreceptor phosphodiesterase cDNA and identification of a sequence variant in dogs with photoreceptor dysplasia. *Gene.* **1998**, *215*, 231–239.
12. Zangerl, B.; Goldstein, O.; Philp, A.R.; Lindauer, S.J.; Pearce-Kelling, S.E.; Mullins, R.F.; Graphodatsky, A.S.; Ripoll, D.; Felix, J.S.; Stone, E.M.; et al. Identical mutation in a novel retinal gene causes progressive rod-cone degeneration in dogs and retinitis pigmentosa in humans. *Genomics* **2006**, *88*, 551–563.
13. Kijas, J.W.; Cideciyan, A.V.; Aleman, T.S.; Pianta, M.J.; Pearce-Kelling, S.E.; Miller, B.J.; Jacobson, S.G.; Aguirre, G.D.; Acland, G.M. Naturally occurring rhodopsin mutation in the dog causes retinal dysfunction and degeneration mimicking human dominant retinitis pigmentosa. *Proc. Natl. Acad. Sci. USA* **2002**, *99*, 6328–6333.
14. Downs, L.M.; Wallin-Hakansson, B.; Boursnell, M.; Marklund, S.; Hedhammar, A.; Truve, K.; Hübinette, L.; Lindblad-Toh, K.; Bergström, T.; Mellersh, C.S. A frameshift mutation in golden retriever dogs with progressive retinal atrophy endorses SLC4A3 as a candidate gene for human retinal degenerations. *PLoS ONE* **2011**, *6*, e21452.
15. Downs, L.M.; Wallin-Hakansson, B.; Bergstrom, T.; Mellersh, C.S. A novel mutation in TTC8 is associated with progressive retinal atrophy in the golden retriever. *Canine Genet. Epidemiol.* **2014**, *1*, 4.
16. Wiik, A.C.; Ropstad, E.O.; Ekesten, B.; Karlstam, L.; Wade, C.M.; Lingsaas, F. Progressive retinal atrophy in Shetland sheepdog is associated with a mutation in the CNGA1 gene. *Anim. Genetic.* **2015**, *46*, 515–521.
17. Mellersh, C.S.; Boursnell, M.E.; Pettitt, L.; Ryder, E.J.; Holmes, N.G.; Grafham, D.; Forman, O.P.; Sampson, J.; Barnett, K.C.; Blanton, S.; et al. Canine RPGRIP1 mutation establishes cone-rod dystrophy in miniature longhaired dachshunds as a homologue of human Leber congenital amaurosis. *Genomics* **2006**, *88*, 293–301.
18. Narfstrom, K.; Jeong, M.; Hyman, J.; Madsen, R.W.; Bergstrom, T.F. Assessment of hereditary retinal degeneration in the English springer spaniel dog and disease relationship to an RPGRIP1 mutation. *Stem Cells Internat.* **2012**, *2012*, 685901.
19. Forman, O.P.; Hitti, R.J.; Boursnell, M.; Miyadera, K.; Sargan, D.; Mellersh, C. Canine genome assembly correction facilitates identification of a MAP9 deletion as a potential age of onset modifier for RPGRIP1-associated canine retinal degeneration. *Mamm Genome.* **2016**, *27*, 237–245.

20. Kropatsch, R.; Petrasch-Parwez, E.; Seelow, D.; Schlichting, A.; Gerding, W.M.; Akkad, D.A.; Epplen, J.T.; Dekomien, G. Generalized progressive retinal atrophy in the Irish Glen of Imaal Terrier is associated with a deletion in the ADAM9 gene. *Mol. Cell Probes* **2010**, *24*, 357–363.
21. Wiik, A.C.; Wade, C.; Biagi, T.; Ropstad, E.O.; Bjerkas, E.; Lindblad-Toh, K.; et al. A deletion in nephronophthisis 4 (NPHP4) is associated with recessive cone-rod dystrophy in standard wire-haired dachshund. *Genome Res.* **2008**, *18*, 1415–1421.
22. Clements, P.J.; Gregory, C.Y.; Peterson-Jones, S.M.; Sargan, D.R.; Bhattacharya, S.S. Confirmation of the rod cGMP phosphodiesterase beta subunit (PDE beta) nonsense mutation in affected rcd-1 Irish setters in the UK and development of a diagnostic test. *Curr. Eye Res.* **1993**, *12*, 861–866.
23. Suber, M.L.; Pittler, S.J.; Qin, N.; Wright, G.C.; Holcombe, V.; Lee, R.H.; Craft, C.M.; Lolley, R.N.; Baehr, W.; Hurwitz, R.L. Irish setter dogs affected with rod/cone dysplasia contain a nonsense mutation in the rod cGMP phosphodiesterase beta-subunit gene. *Proc. Natl. Acad. Sci. USA* **1993**, *90*, 3968–3972.
24. Dekomien, G.; Runte, M.; Godde, R.; Epplen, J.T. Generalized progressive retinal atrophy of Sloughi dogs is due to an 8-bp insertion in exon 21 of the PDE6B gene. *Cytogenet. Cell Genetic.* **2000**, *90*, 261–267.
25. Petersen-Jones, S.M.; Entz, D.D.; Sargan, D.R. cGMP phosphodiesterase-alpha mutation causes progressive retinal atrophy in the Cardigan Welsh corgi dog. *Invest. Ophthalmol. Vis. Sci.* **1999**, *40*, 1637–1644.
26. Downs, L.M.; Bell, J.S.; Freeman, J.; Hartley, C.; Hayward, L.J.; Mellersh, C.S. Late-onset progressive retinal atrophy in the Gordon and Irish Setter breeds is associated with a frameshift mutation in C2orf71. *Anim. Genetic.* **2013**, *44*, 169–177.
27. Downs, L.M.; Mellersh, C.S. An Intronic SINE insertion in FAM161A that causes exon-skipping is associated with progressive retinal atrophy in Tibetan Spaniels and Tibetan Terriers. *PLoS ONE* **2014**, *9*, e93990.
28. Acland, G.M.; Ray, K.; Mellersh, C.S.; Langston, A.A.; Rine, J.; Ostrander, E.A.; Aguirre, G.D. A novel retinal degeneration locus identified by linkage and comparative mapping of canine early retinal degeneration. *Genomics* **1999**, *59*, 134–142.
29. Goldstein, O.; Kukekova, A.V.; Aguirre, G.D.; Acland, G.M. Exonic SINE insertion in STK38L causes canine early retinal degeneration (erd). *Genomics* **2010**, *96*, 362–368.
